# Supplementary material for: Electron counting and bonding patterns in assemblies of three and more silver-rich superatoms
Source: Royal Society of Chemistry journal article supplement (doi:10.1039/d0nr05179a), 2020-01-01
Supplement: d0nr05179a1.pdf [file d0nr05179a1.pdf]

**Electron counting and bonding patterns in assemblies of three, four and more silver-rich  
superatoms**

*Franck Gam<sup>a</sup>, C. W. Liu<sup>b</sup>, Samia Kahlal<sup>a</sup>, Jean-Yves Saillard<sup>a\*</sup>*

<sup>a</sup> Univ Rennes, CNRS, ISCR-UMR 6226, F-35000 Rennes, France

<sup>b</sup> Department of Chemistry, National Dong Hwa University, No. 1, Sec. 2, Da Hsueh Rd.,  
Shoufeng, Hualien 97401 (Taiwan, R.O.C.).

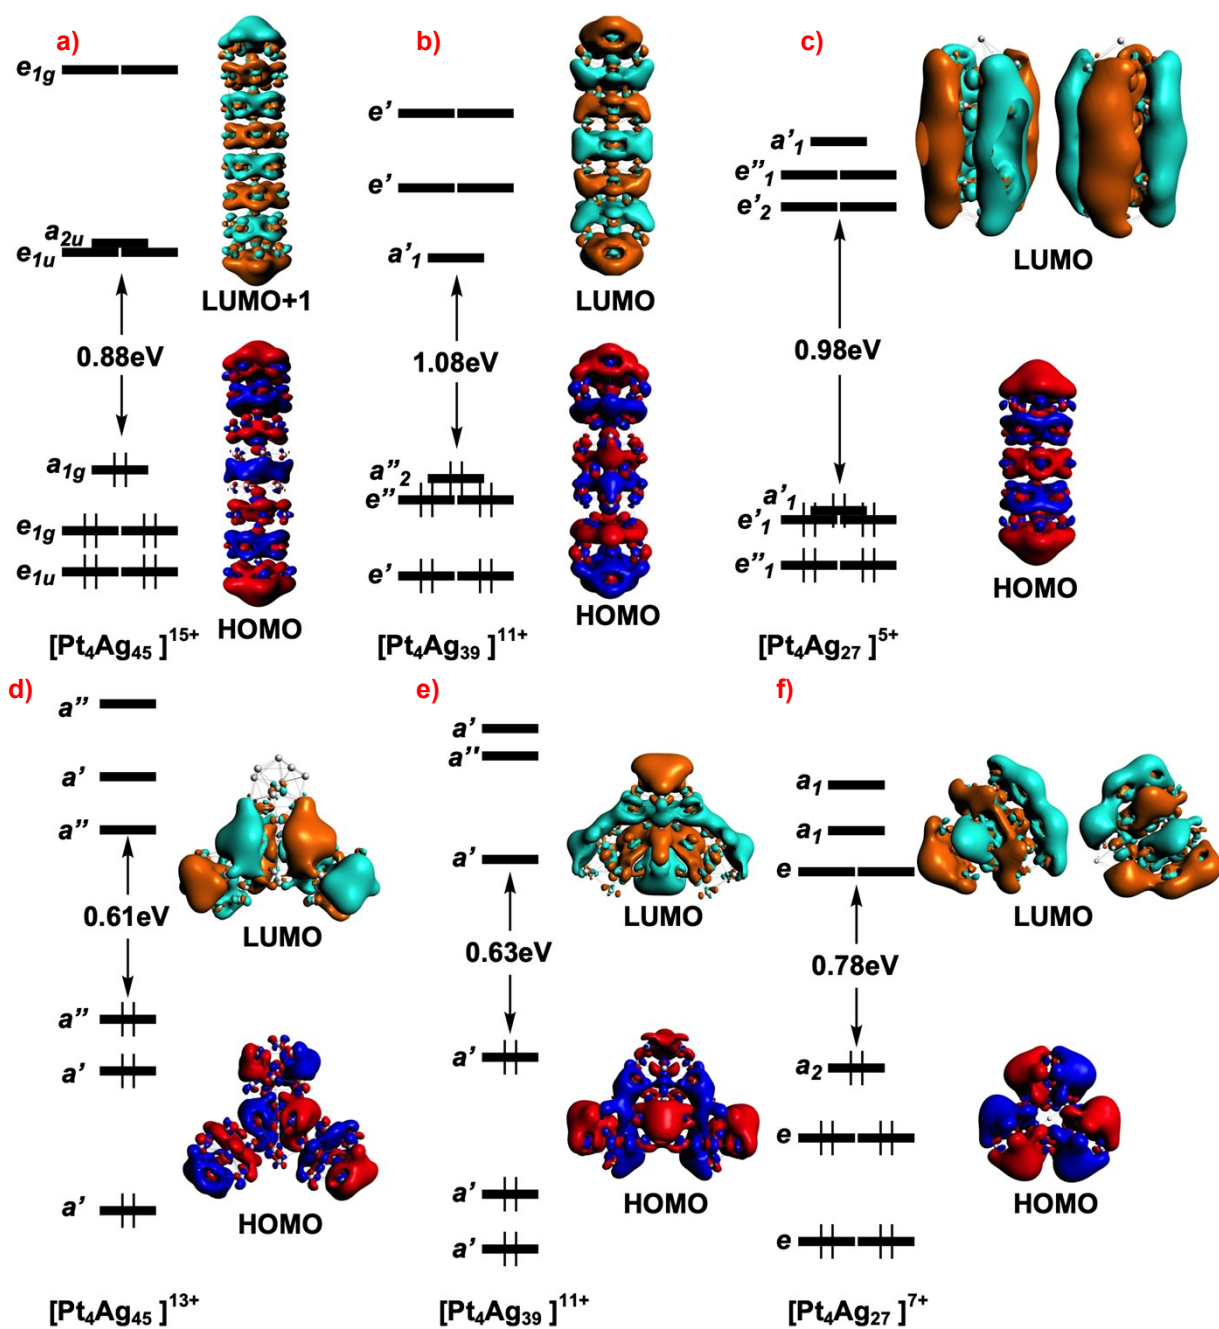

Figure S1. Kohn-Sham orbital diagrams of : (a) The 30-electron  $[\text{Pt}_4\text{Ag}_{45}]^{15+}$  ( $D_{5d}$ ), (b) the 28-electron  $[\text{Pt}_4\text{Ag}_{39}]^{11+}$  ( $D_{3h}$ ), (c) the 22-electron  $[\text{Pt}_4\text{Ag}_{27}]^{5+}$  ( $D_{5h}$ ), (d) the 32-electron  $[\text{Pt}_4\text{Ag}_{45}]^{13+}$  ( $C_s$ ), (e) the 28-electron  $[\text{Pt}_4\text{Ag}_{39}]^{11+}$  ( $C_s$ ), (f) the 20-electron  $[\text{Pt}_4\text{Ag}_{27}]^{7+}$  ( $C_{3v}$ ).

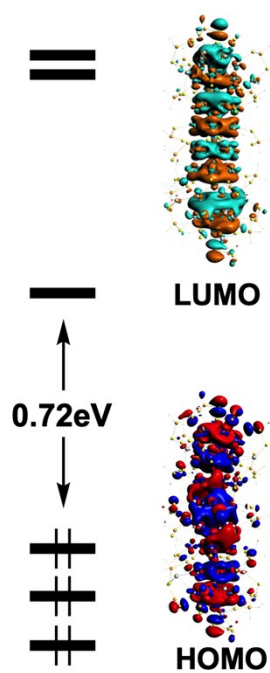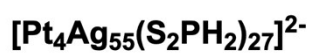

Figure S2. Kohn-Sham orbital diagram of the ligated 30-electron model  $[\text{Pt}_4\text{Ag}_{55}(\text{S}_2\text{PH}_2)_{27}]^{2-}$  that contains the  $[\text{Pt}_4\text{Ag}_{45}]^{15+}$  core (compare with Figure 1a).
